# Supplementary material for: In situ synthesis of a self-assembled AB/B blend of poly(ethylene glycol)-b-polystyrene/polystyrene by dispersion RAFT polymerization
Source: Royal Society of Chemistry journal article supplement (doi:10.1039/c7py00339k), 2017-01-01
Supplement: c7py00339k1.pdf [file c7py00339k1.pdf]

## Supporting Information for:

### In situ synthesis of the self-assembled AB/B blend of poly(ethylene glycol)-*b*-polystyrene/polystyrene by dispersion RAFT polymerization

Bing Yuan,<sup>†a</sup> Xin He,<sup>†a</sup> Yaqing Qu,<sup>a</sup> Chengqiang Gao,<sup>a</sup> Erika Eiser,<sup>b</sup> and Wangqing Zhang<sup>\*a,c</sup>

<sup>a</sup> Key Laboratory of Functional Polymer Materials of the Ministry of Education, Institute of Polymer Chemistry, College of Chemistry, Nankai University, Tianjin 300071, China.

<sup>b</sup> Cavendish Laboratory, University of Cambridge, Cambridge CB3 0HE, United Kingdom.

<sup>c</sup> Collaborative Innovation Center of Chemical Science and Engineering (Tianjin), Nankai University, Tianjin 300071, China.

\*To whom correspondence should be addressed. E-mail: (W. Zhang) wqzhang@nankai.edu.cn, Tel: +86-22-23509794, Fax: +86-22-23503510.

† These authors contributed equally to this manuscript.

#### 1. Synthesis of the PEG<sub>45</sub>-*b*-PS<sub>282</sub> nano-assemblies

The PEG<sub>45</sub>-*b*-PS<sub>282</sub> nano-assemblies were synthesized by dispersion RAFT polymerization of styrene in the methanol/water mixture (80/20 w/w) at 70 °C with the weight ratio of the styrene monomer to the solvent at 15% under [St]<sub>0</sub>:[PEG<sub>45</sub>-TTC]<sub>0</sub>:[AIBN]<sub>0</sub> = 300:1:1/3. Into a 25 mL Schlenk flask with a magnetic bar, PEG<sub>45</sub>-TTC (0.075 g, 0.0320 mmol), St (1.00 g, 9.60 mmol), and AIBN (1.76 mg, 0.0107 mmol) were dissolved in the methanol/water mixture (80/20 w/w, 6.67 g). And then the mixture was degassed with nitrogen at 0 °C. The polymerization was started by immersing the flask into a preheated oil bath at 70 °C. After 24 h, the polymerization was quenched by immersing the flask in iced water and the polymerization solution was exposed to air. The monomer conversion, molecular weight, polydispersity index,  $M_{n,GPC}$  and <sup>1</sup>H NMR of PEG<sub>45</sub>-*b*-PS<sub>282</sub> were determined by the same characterization techniques of the PEG-*b*-PS/PS self-assembled blend.

## 2. Synthesis of the PS<sub>280</sub> homopolymer particles

The PS<sub>280</sub> homopolymer particles were synthesized by dispersion RAFT polymerization under [St]<sub>0</sub>: [DDMAT]<sub>0</sub>: [AIBN]<sub>0</sub> = 300:1:1/3 in the presence of the PVP stabilizer with the weight ratio of the styrene monomer to the solvent at 15%. Into a 25 mL Schlenk flask with a magnetic bar, DDMAT (0.012 g, 0.0328 mmol), St (1.00 g, 9.60 mmol), AIBN (1.76 mg, 0.0107 mmol) and stabilizer PVP (0.30 g) dissolved in the methanol/water mixture (80/20 w/w, 6.67 g) were added, and then the mixture was degassed with nitrogen at 0 °C. The polymerization was started by immersing the flask into a preheated oil bath at 70 °C. After 25 h, the polymerization was quenched by immersing the flask in iced water and the polymerization solution was exposed to air. The monomer conversion was determined by <sup>1</sup>H NMR, and the morphology of the PS<sub>280</sub> homopolymer particles was checked by TEM. To collect the PS<sub>280</sub> homopolymer for GPC and <sup>1</sup>H NMR analysis, the particles were separated by centrifugation (10000 rpm, 3 min), washed with methanol, dissolved in DCM, precipitated into methanol, collected by three precipitation/filtration cycles, and finally dried under vacuum at room temperature.

## 3. Equations

$$\text{Degree of polymerization (DP)} = \text{monomer conversion (\%)} \times \frac{[\text{St}]_0}{\sum[\text{RAFT agent}]} \quad (\text{S1})$$

The equation for the calculation of DP based on monomer conversion, where [St]<sub>0</sub> denotes the initial concentration of St monomer, and  $\sum[\text{RAFT agent}]$  is the total concentration of RAFT agents.

## 4. Figures

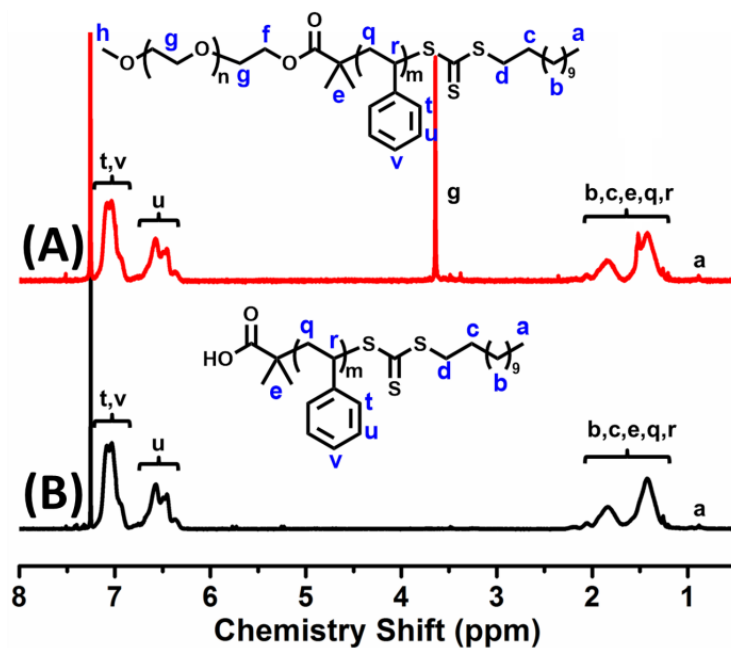

**Figure S1.** <sup>1</sup>H NMR spectra of PEG<sub>45</sub>-b-PS<sub>282</sub> (A) and PS<sub>280</sub> (B) prepared by dispersion RAFT polymerization.

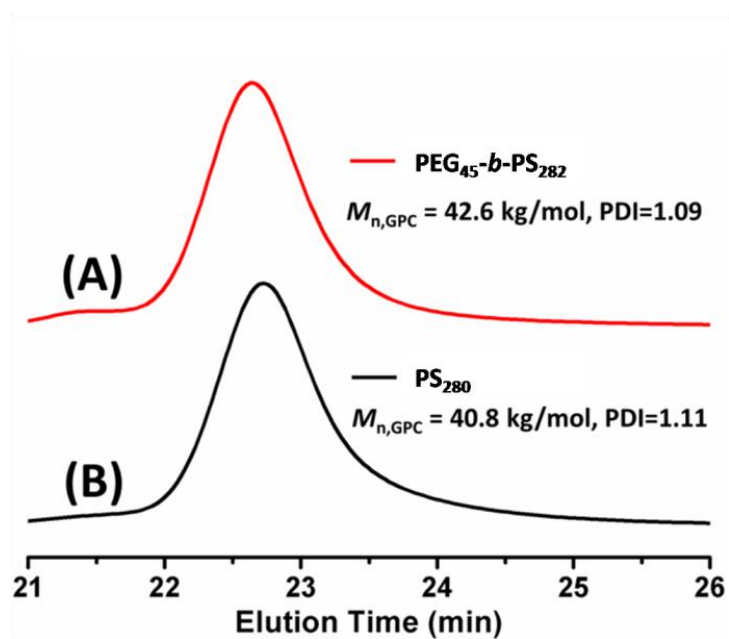

**Figure S2.** GPC traces of PEG<sub>45</sub>-b-PS<sub>282</sub> (A) and PS<sub>280</sub> (B).

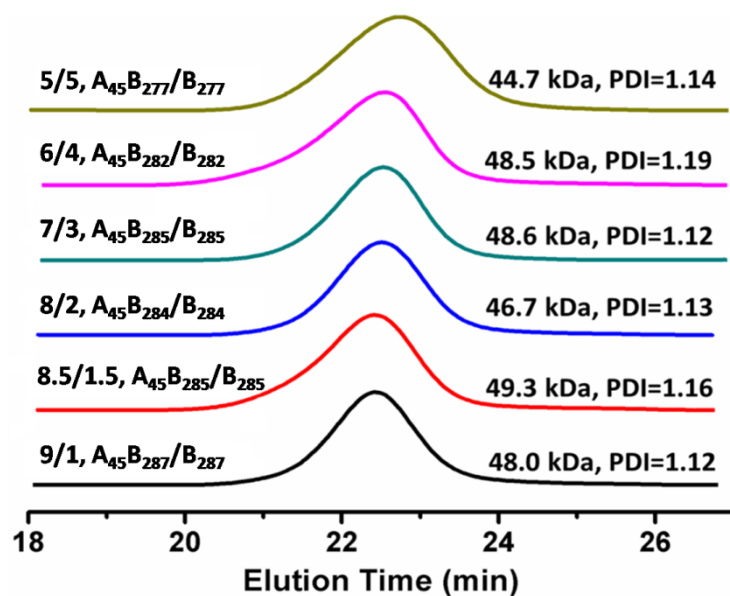

**Figure S3.** The GPC traces of the PEG-*b*-PS/PS self-assembled blend synthesized through dispersion RAFT polymerization at the polymerization time of 25 h under  $[St]_0:[RAFT]_0:[AIBN]_0 = 300:1:1/3$ , with the PEG<sub>45</sub>-TTC/DDMAT molar ratio at 9/1, 8.5/1.5, 8/2, 7/3, 6/4, and 5/5.
